# Supplementary material for: FABP5 promotes lymph node metastasis in cervical cancer by reprogramming fatty acid metabolism
Source: PubMed Central journal article supplement (PMC7295046; doi:10.7150/thno.44868), 2020-05-17
Supplement: thnov10p6561s1.pdf [file thnov10p6561s1.pdf]

**Table S1. Clinicopathological data of cervical cancer patients included in the IHC study.**

| No. | Age<br>(years) | LNM      | Tumour<br>size<br>(cm) | FIGO<br>stage | Differe<br>ntiation | BMI<br>(kg/m <sup>2</sup> ) | LVSI     | Parametrium<br>invasion | Vaginal<br>invasion | Stromal<br>invasion |
|-----|----------------|----------|------------------------|---------------|---------------------|-----------------------------|----------|-------------------------|---------------------|---------------------|
| 1   | 46             | negative | 3.5                    | IB2           | G1                  | 25.6                        | Negative | negative                | positive            | less than 1/2       |
| 2   | 41             | positive | 5                      | IA2           | G1                  | 27                          | Negative | negative                | negative            | more than 1/2       |
| 3   | 39             | positive | 4.5                    | IIA1          | G2                  | 26.9                        | Negative | negative                | negative            | less than 1/2       |
| 4   | 30             | negative | 4.5                    | IB1           | G3                  | 24.1                        | Negative | negative                | negative            | less than 1/2       |
| 5   | 37             | negative | 4.5                    | IIA2          | G3                  | 29.1                        | Negative | negative                | negative            | less than 1/2       |
| 6   | 60             | negative | 2                      | IB1           | G3                  | 23.5                        | Negative | negative                | negative            | less than 1/2       |
| 7   | 50             | negative | 1.5                    | IIA2          | G1                  | 21.5                        | Negative | negative                | positive            | less than 1/2       |
| 8   | 45             | negative | 5                      | IA2           | G3                  | 22.7                        | positive | positive                | negative            | more than 1/2       |
| 9   | 36             | negative | 2                      | IB2           | G3                  | 23.1                        | Negative | negative                | negative            | more than 1/2       |
| 10  | 31             | negative | 5                      | IIA2          | G3                  | 23.8                        | Negative | negative                | negative            | less than 1/2       |
| 11  | 48             | positive | 5.5                    | IB2           | G1                  | 30                          | positive | negative                | negative            | more than 1/2       |
| 12  | 35             | positive | 5                      | IIA1          | G3                  | 28                          | Negative | positive                | negative            | less than 1/2       |
| 13  | 49             | positive | 5.5                    | IIA1          | G1                  | 22.5                        | Negative | negative                | negative            | more than 1/2       |
| 14  | 43             | negative | 3.5                    | IB1           | G3                  | 21.8                        | Negative | negative                | positive            | less than 1/2       |
| 15  | 34             | negative | 1.5                    | IIA1          | G1                  | 29.1                        | Negative | negative                | negative            | more than 1/2       |
| 16  | 28             | negative | 3                      | IB1           | G1                  | 21.9                        | Negative | positive                | negative            | less than 1/2       |
| 17  | 64             | negative | 3                      | IB2           | G3                  | 24.5                        | Negative | negative                | negative            | more than 1/2       |
| 18  | 29             | negative | 0.5                    | IB1           | G1                  | 32                          | Negative | negative                | positive            | less than 1/2       |
| 19  | 40             | negative | 0.5                    | IB1           | G3                  | 31.5                        | Negative | negative                | negative            | less than 1/2       |
| 20  | 34             | negative | 1.5                    | IB1           | G3                  | 24.1                        | Negative | negative                | negative            | more than 1/2       |
| 21  | 47             | positive | 4.5                    | IB2           | G2                  | 32                          | Negative | negative                | negative            | less than 1/2       |
| 22  | 27             | negative | 2                      | IIA1          | G3                  | 23.5                        | Negative | negative                | positive            | less than 1/2       |
| 23  | 34             | negative | 5                      | IIA1          | G2                  | 23.1                        | Negative | negative                | negative            | more than 1/2       |
| 24  | 46             | negative | 3                      | IA2           | G3                  | 22.8                        | Negative | negative                | negative            | more than 1/2       |
| 25  | 42             | negative | 2                      | IB1           | G1                  | 22.9                        | Negative | negative                | negative            | less than 1/2       |
| 26  | 35             | positive | 5                      | IIA1          | G2                  | 28.4                        | Negative | negative                | negative            | more than 1/2       |
| 27  | 38             | negative | 5                      | IB2           | G3                  | 23.5                        | Negative | negative                | negative            | less than 1/2       |
| 28  | 34             | negative | 2                      | IB1           | G3                  | 23.8                        | Negative | negative                | negative            | less than 1/2       |
| 29  | 50             | negative | 5                      | IB2           | G3                  | 22.4                        | Negative | negative                | negative            | less than 1/2       |
| 30  | 34             | negative | 5                      | IIA2          | G2                  | 22.1                        | Negative | negative                | negative            | more than 1/2       |
| 31  | 42             | negative | 0.5                    | IIA2          | G3                  | 21.8                        | Negative | negative                | negative            | less than 1/2       |
| 32  | 34             | negative | 5                      | IB1           | G2                  | 21.9                        | Negative | negative                | positive            | more than 1/2       |
| 33  | 41             | negative | 2.5                    | IA2           | G2                  | 20.9                        | Negative | negative                | negative            | less than 1/2       |
| 34  | 41             | negative | 1.5                    | IB1           | G2                  | 21.1                        | Negative | negative                | negative            | more than 1/2       |
| 35  | 43             | positive | 2                      | IB1           | G1                  | 26.7                        | positive | positive                | negative            | more than 1/2       |
| 36  | 42             | negative | 2                      | IB1           | G2                  | 23.4                        | Negative | negative                | negative            | more than 1/2       |
| 37  | 53             | positive | 5                      | IB2           | G3                  | 24.1                        | positive | positive                | negative            | less than 1/2       |
| 38  | 31             | negative | 5                      | IB1           | G3                  | 24.5                        | Negative | negative                | negative            | less than 1/2       |
| 39  | 47             | negative | 1.5                    | IB1           | G3                  | 23.5                        | Negative | negative                | negative            | more than 1/2       |
| 40  | 36             | negative | 1.5                    | IIA1          | G3                  | 28.1                        | Negative | negative                | positive            | more than 1/2       |

|    |    |          |     |      |    |      |          |          |          |               |
|----|----|----------|-----|------|----|------|----------|----------|----------|---------------|
| 41 | 42 | negative | 1.5 | IB1  | G3 | 26.7 | Negative | negative | negative | more than 1/2 |
| 42 | 53 | negative | 4.5 | IA2  | G2 | 21.3 | Negative | negative | negative | more than 1/2 |
| 43 | 50 | negative | 4.5 | IB1  | G3 | 24.1 | Negative | negative | negative | less than 1/2 |
| 44 | 42 | negative | 0.5 | IIA1 | G3 | 26.1 | Negative | negative | negative | less than 1/2 |
| 45 | 38 | positive | 5.5 | IB1  | G3 | 23.5 | positive | negative | negative | more than 1/2 |
| 46 | 40 | negative | 0.5 | IB2  | G3 | 28   | Negative | negative | negative | less than 1/2 |
| 47 | 42 | negative | 4.5 | IB1  | G2 | 21.9 | Negative | negative | positive | more than 1/2 |
| 48 | 37 | positive | 3   | IIA1 | G3 | 23.3 | positive | negative | negative | more than 1/2 |
| 49 | 42 | positive | 2   | IIA1 | G2 | 28.1 | positive | negative | negative | more than 1/2 |
| 50 | 39 | positive | 5   | IB1  | G3 | 29.1 | positive | negative | negative | more than 1/2 |
| 51 | 49 | negative | 2   | IB2  | G3 | 27.3 | Negative | positive | positive | less than 1/2 |
| 52 | 45 | negative | 3   | IB1  | G2 | 22.8 | Negative | negative | negative | less than 1/2 |
| 53 | 49 | negative | 2.5 | IB1  | G3 | 26.9 | Negative | negative | negative | more than 1/2 |
| 54 | 43 | negative | 2.5 | IB1  | G3 | 22.9 | Negative | negative | negative | more than 1/2 |
| 55 | 29 | negative | 3   | IIA2 | G3 | 22.5 | Negative | negative | negative | less than 1/2 |
| 56 | 30 | negative | 3   | IB2  | G2 | 23.8 | positive | negative | positive | more than 1/2 |
| 57 | 40 | negative | 2.5 | IB2  | G2 | 22.6 | Negative | negative | negative | more than 1/2 |
| 58 | 38 | negative | 0.5 | IIA2 | G3 | 22.1 | Negative | negative | negative | less than 1/2 |
| 59 | 39 | negative | 2   | IB2  | G3 | 21.8 | Negative | negative | positive | less than 1/2 |
| 60 | 40 | negative | 1.5 | IB1  | G2 | 21.9 | Negative | negative | negative | more than 1/2 |
| 61 | 32 | negative | 2   | IB1  | G3 | 28.9 | Negative | negative | positive | more than 1/2 |
| 62 | 54 | positive | 2   | IB2  | G2 | 28.5 | positive | negative | negative | less than 1/2 |
| 63 | 49 | negative | 2   | IB2  | G2 | 21.5 | Negative | negative | negative | more than 1/2 |
| 64 | 43 | negative | 4.5 | IB1  | G3 | 21.3 | Negative | positive | negative | less than 1/2 |
| 65 | 40 | positive | 3.5 | IB1  | G2 | 23.4 | positive | negative | negative | more than 1/2 |
| 66 | 53 | negative | 3   | IB1  | G3 | 29.9 | positive | negative | negative | more than 1/2 |
| 67 | 40 | negative | 2.5 | IB1  | G3 | 24.5 | Negative | negative | negative | less than 1/2 |
| 68 | 56 | negative | 4   | IB1  | G3 | 22.3 | Negative | negative | negative | more than 1/2 |
| 69 | 51 | negative | 1   | IB2  | G3 | 24.1 | Negative | negative | negative | more than 1/2 |
| 70 | 29 | negative | 3   | IIA1 | G3 | 23.5 | Negative | negative | positive | less than 1/2 |
| 71 | 42 | negative | 2.5 | IB1  | G2 | 21.9 | Negative | negative | positive | less than 1/2 |
| 72 | 60 | negative | 4.5 | IIA1 | G3 | 23.3 | Negative | positive | negative | more than 1/2 |
| 73 | 60 | negative | 2.5 | IIA2 | G2 | 31.2 | Negative | negative | negative | more than 1/2 |
| 74 | 44 | negative | 5   | IIA2 | G3 | 30.3 | positive | negative | negative | more than 1/2 |
| 75 | 38 | negative | 3   | IB2  | G3 | 22.8 | Negative | negative | positive | more than 1/2 |
| 76 | 42 | negative | 0.5 | IB1  | G3 | 22.9 | Negative | negative | negative | less than 1/2 |
| 77 | 43 | positive | 3.5 | IB2  | G1 | 28.9 | positive | negative | negative | more than 1/2 |
| 78 | 32 | negative | 2.5 | IIA2 | G3 | 22.5 | Negative | negative | negative | more than 1/2 |
| 79 | 49 | negative | 3   | IIA1 | G2 | 23.7 | Negative | negative | negative | more than 1/2 |
| 80 | 37 | negative | 0.5 | IB1  | G2 | 22.6 | Negative | negative | negative | less than 1/2 |
| 81 | 40 | negative | 2.5 | IA2  | G3 | 27.8 | Negative | negative | negative | less than 1/2 |
| 82 | 35 | positive | 3   | IB1  | G3 | 21.1 | Negative | negative | negative | less than 1/2 |
| 83 | 45 | negative | 1.5 | IB1  | G2 | 21.8 | Negative | negative | negative | less than 1/2 |
| 84 | 32 | negative | 2   | IA2  | G3 | 21.9 | Negative | negative | negative | more than 1/2 |

|     |    |          |     |      |    |      |          |          |          |               |
|-----|----|----------|-----|------|----|------|----------|----------|----------|---------------|
| 85  | 49 | negative | 2.5 | IA2  | G2 | 19.5 | Negative | negative | negative | more than 1/2 |
| 86  | 36 | positive | 5   | IB2  | G3 | 21.3 | Negative | negative | negative | more than 1/2 |
| 87  | 62 | negative | 2.5 | IIA2 | G2 | 23.4 | Negative | positive | negative | more than 1/2 |
| 88  | 41 | negative | 3.5 | IIA1 | G3 | 22.9 | Negative | negative | positive | more than 1/2 |
| 89  | 46 | negative | 3.5 | IIA1 | G3 | 22.5 | Negative | negative | negative | less than 1/2 |
| 90  | 42 | negative | 3   | IB2  | G2 | 21.1 | Negative | negative | negative | less than 1/2 |
| 91  | 36 | negative | 3   | IB1  | G2 | 22.9 | Negative | negative | negative | less than 1/2 |
| 92  | 45 | negative | 3   | IB1  | G2 | 22.1 | Negative | negative | negative | more than 1/2 |
| 93  | 30 | negative | 3.5 | IB1  | G2 | 23.8 | Negative | negative | negative | less than 1/2 |
| 94  | 42 | negative | 5   | IB1  | G2 | 26.7 | Negative | negative | positive | more than 1/2 |
| 95  | 43 | negative | 2   | IB1  | G3 | 25.9 | Negative | negative | negative | less than 1/2 |
| 96  | 28 | negative | 2   | IIA1 | G3 | 21.9 | Negative | negative | negative | less than 1/2 |
| 97  | 55 | positive | 4.5 | IA2  | G2 | 21.5 | positive | negative | negative | more than 1/2 |
| 98  | 51 | negative | 2.5 | IA2  | G3 | 28   | Negative | negative | negative | more than 1/2 |
| 99  | 51 | negative | 2   | IB1  | G3 | 29.1 | Negative | negative | negative | less than 1/2 |
| 100 | 30 | negative | 2.5 | IB1  | G3 | 21.3 | Negative | negative | negative | more than 1/2 |
| 101 | 44 | negative | 2   | IIA2 | G2 | 23.4 | Negative | negative | positive | more than 1/2 |
| 102 | 41 | positive | 4.5 | IB1  | G2 | 24.5 | Negative | negative | negative | more than 1/2 |
| 103 | 45 | positive | 3   | IB1  | G1 | 22.3 | Negative | negative | negative | more than 1/2 |
| 104 | 43 | negative | 3   | IB1  | G3 | 32   | Negative | negative | positive | less than 1/2 |
| 105 | 45 | negative | 3   | IB1  | G3 | 24.1 | Negative | negative | negative | more than 1/2 |
| 106 | 49 | positive | 2.5 | IIA1 | G2 | 24.5 | Negative | negative | negative | more than 1/2 |
| 107 | 43 | negative | 3.5 | IB2  | G3 | 21.8 | Negative | negative | negative | less than 1/2 |
| 108 | 34 | negative | 1.5 | IB1  | G3 | 31.5 | Negative | negative | negative | more than 1/2 |
| 109 | 68 | negative | 5   | IIA1 | G3 | 32.2 | Negative | negative | negative | more than 1/2 |
| 110 | 64 | negative | 3   | IB1  | G2 | 23.5 | Negative | negative | negative | less than 1/2 |
| 111 | 51 | negative | 3   | IA2  | G3 | 22.8 | Negative | negative | positive | less than 1/2 |
| 112 | 40 | negative | 0.5 | IB1  | G2 | 24.9 | Negative | negative | negative | less than 1/2 |
| 113 | 34 | negative | 1.5 | IB1  | G3 | 22.5 | Negative | negative | negative | less than 1/2 |
| 114 | 47 | negative | 4.5 | IA2  | G3 | 28.4 | Negative | negative | negative | less than 1/2 |
| 116 | 34 | negative | 1.5 | IB2  | G3 | 24.7 | Negative | negative | positive | more than 1/2 |
| 116 | 27 | negative | 5   | IIA1 | G3 | 26.7 | Negative | negative | negative | more than 1/2 |
| 117 | 31 | negative | 4.5 | IB1  | G3 | 23.6 | Negative | negative | negative | more than 1/2 |
| 118 | 42 | negative | 4.5 | IB1  | G2 | 24.3 | Negative | negative | negative | less than 1/2 |
| 119 | 35 | positive | 1.5 | IB2  | G2 | 26.1 | Negative | negative | negative | more than 1/2 |
| 120 | 38 | negative | 0.5 | IB1  | G1 | 20.5 | Negative | negative | negative | less than 1/2 |
| 121 | 44 | negative | 2   | IB1  | G3 | 26.7 | Negative | negative | negative | less than 1/2 |
| 122 | 50 | negative | 5   | IB1  | G3 | 21.9 | Negative | negative | negative | less than 1/2 |
| 123 | 34 | negative | 2   | IB1  | G1 | 23.5 | Negative | negative | negative | more than 1/2 |
| 124 | 42 | negative | 1.5 | IIA2 | G3 | 22.8 | Negative | negative | negative | less than 1/2 |
| 125 | 45 | negative | 5   | IIA1 | G3 | 28.1 | Negative | negative | negative | more than 1/2 |
| 126 | 41 | negative | 1.5 | IB1  | G2 | 22.1 | Negative | negative | negative | less than 1/2 |
| 127 | 41 | positive | 1.5 | IB1  | G1 | 28   | Negative | negative | negative | more than 1/2 |
| 128 | 43 | positive | 2.5 | IB1  | G2 | 22.5 | positive | negative | negative | more than 1/2 |

|     |    |          |     |      |    |      |          |          |          |               |
|-----|----|----------|-----|------|----|------|----------|----------|----------|---------------|
| 129 | 42 | negative | 2   | IB1  | G3 | 28.1 | Negative | negative | negative | more than 1/2 |
| 130 | 51 | positive | 2   | IB1  | G3 | 29.1 | positive | positive | negative | less than 1/2 |
| 131 | 31 | negative | 2.5 | IB1  | G2 | 23.8 | Negative | negative | negative | less than 1/2 |
| 132 | 47 | negative | 2   | IB2  | G3 | 22.6 | Negative | negative | negative | more than 1/2 |
| 133 | 45 | negative | 1.5 | IIA1 | G3 | 25   | Negative | negative | negative | less than 1/2 |
| 134 | 32 | negative | 2   | IIA2 | G3 | 21.8 | Negative | negative | negative | more than 1/2 |
| 135 | 49 | negative | 2.5 | IIA2 | G2 | 23.9 | Negative | negative | negative | more than 1/2 |
| 136 | 39 | positive | 3   | IB1  | G3 | 27.3 | Negative | negative | negative | more than 1/2 |
| 137 | 62 | negative | 2.5 | IB1  | G2 | 28.9 | Negative | negative | negative | more than 1/2 |
| 138 | 41 | negative | 2   | IIA2 | G2 | 28.9 | Negative | positive | positive | more than 1/2 |
| 139 | 46 | negative | 3.5 | IB1  | G2 | 19.1 | Negative | negative | negative | less than 1/2 |
| 140 | 42 | negative | 3   | IIA1 | G3 | 29.5 | Negative | negative | negative | less than 1/2 |
| 141 | 36 | negative | 4.5 | IB1  | G2 | 21.3 | Negative | negative | negative | less than 1/2 |
| 142 | 29 | negative | 3   | IB1  | G3 | 23.4 | Negative | negative | negative | more than 1/2 |
| 143 | 45 | negative | 3.5 | IB1  | G3 | 29.9 | Negative | negative | negative | less than 1/2 |
| 144 | 42 | negative | 3   | IIA1 | G3 | 31.2 | Negative | negative | positive | more than 1/2 |
| 145 | 43 | negative | 4.5 | IB2  | G3 | 21.9 | Negative | negative | negative | less than 1/2 |
| 146 | 28 | negative | 2   | IB1  | G3 | 31.3 | Negative | negative | negative | less than 1/2 |
| 147 | 55 | positive | 3   | IB1  | G2 | 28.9 | positive | negative | negative | more than 1/2 |
| 148 | 51 | negative | 4.5 | IB1  | G3 | 22.5 | Negative | negative | negative | more than 1/2 |
| 149 | 51 | negative | 2   | IB1  | G3 | 27.8 | Negative | negative | negative | less than 1/2 |
| 150 | 30 | negative | 2.5 | IB1  | G3 | 28.7 | Negative | negative | negative | more than 1/2 |
| 151 | 44 | negative | 2   | IIA1 | G3 | 25.9 | Negative | negative | negative | more than 1/2 |
| 152 | 41 | positive | 4.5 | IIA1 | G2 | 31.3 | Negative | negative | negative | more than 1/2 |
| 153 | 50 | positive | 3   | IB1  | G3 | 28.9 | Negative | negative | negative | more than 1/2 |
| 154 | 43 | negative | 3   | IB2  | G2 | 21.1 | Negative | negative | positive | less than 1/2 |
| 155 | 35 | negative | 3   | IB1  | G3 | 22.9 | Negative | negative | positive | more than 1/2 |
| 156 | 49 | positive | 5.5 | IB1  | G3 | 28.8 | Negative | negative | negative | more than 1/2 |
| 157 | 43 | negative | 3.5 | IB1  | G3 | 22.1 | Negative | negative | negative | less than 1/2 |
| 158 | 34 | negative | 1.5 | IB1  | G3 | 23.8 | Negative | negative | negative | more than 1/2 |
| 159 | 68 | negative | 5   | IB1  | G3 | 25   | Negative | negative | negative | less than 1/2 |
| 160 | 64 | negative | 3   | IB1  | G3 | 26.7 | Negative | negative | negative | less than 1/2 |
| 161 | 51 | negative | 0.5 | IIA1 | G2 | 21.5 | Negative | negative | positive | less than 1/2 |
| 162 | 40 | negative | 0.5 | IB1  | G2 | 25   | Negative | negative | negative | less than 1/2 |
| 163 | 34 | negative | 1.5 | IB1  | G3 | 21.8 | Negative | negative | negative | less than 1/2 |
| 164 | 47 | negative | 4.5 | IA2  | G3 | 23.9 | Negative | negative | negative | less than 1/2 |
| 165 | 27 | negative | 1   | IB1  | G2 | 26.9 | Negative | negative | negative | more than 1/2 |
| 166 | 34 | negative | 5   | IB1  | G3 | 22.1 | Negative | negative | negative | more than 1/2 |
| 167 | 46 | negative | 3.5 | IB1  | G2 | 23.3 | Negative | negative | negative | more than 1/2 |
| 168 | 47 | negative | 4.5 | IB1  | G2 | 23.4 | Negative | negative | negative | less than 1/2 |
| 169 | 27 | negative | 2   | IB2  | G3 | 21.9 | Negative | negative | positive | more than 1/2 |
| 170 | 34 | negative | 5   | IB1  | G2 | 23.5 | Negative | negative | negative | more than 1/2 |
| 171 | 46 | negative | 4.5 | IIA2 | G3 | 28   | Negative | negative | negative | more than 1/2 |
| 172 | 42 | negative | 4.5 | IB1  | G3 | 29.1 | Negative | negative | negative | less than 1/2 |

|     |    |          |     |      |    |      |          |          |          |               |
|-----|----|----------|-----|------|----|------|----------|----------|----------|---------------|
| 173 | 35 | negative | 5   | IB1  | G3 | 21.1 | Negative | negative | negative | more than 1/2 |
| 174 | 38 | negative | 5   | IB2  | G3 | 32   | Negative | negative | negative | less than 1/2 |
| 175 | 34 | negative | 4.5 | IIA2 | G3 | 22.9 | Negative | negative | negative | less than 1/2 |
| 176 | 50 | negative | 3.5 | IA2  | G2 | 32.5 | Negative | negative | negative | less than 1/2 |
| 177 | 34 | negative | 5   | IB1  | G3 | 24.1 | Negative | negative | positive | more than 1/2 |
| 178 | 42 | negative | 0.5 | IB2  | G2 | 22.8 | Negative | negative | negative | less than 1/2 |
| 179 | 45 | negative | 5   | IB1  | G3 | 22.5 | Negative | negative | negative | less than 1/2 |
| 180 | 41 | negative | 2   | IB1  | G3 | 32   | Negative | positive | negative | less than 1/2 |
| 181 | 41 | positive | 1.5 | IB1  | G3 | 29.4 | Negative | negative | negative | less than 1/2 |
| 182 | 43 | positive | 3   | IB2  | G3 | 26.7 | positive | negative | negative | more than 1/2 |
| 183 | 42 | negative | 2   | IIA2 | G3 | 24.7 | Negative | negative | negative | more than 1/2 |
| 184 | 51 | positive | 5   | IB1  | G2 | 28.1 | positive | negative | negative | less than 1/2 |
| 185 | 31 | negative | 4.5 | IB1  | G2 | 27.7 | Negative | negative | negative | less than 1/2 |
| 186 | 47 | negative | 5   | IB2  | G3 | 23.6 | Negative | negative | negative | more than 1/2 |
| 187 | 36 | negative | 4.5 | IB1  | G3 | 24.3 | Negative | negative | positive | more than 1/2 |
| 188 | 42 | negative | 1   | IB1  | G2 | 22.5 | Negative | negative | negative | more than 1/2 |
| 189 | 53 | negative | 2   | IB1  | G3 | 26.1 | Negative | negative | negative | more than 1/2 |
| 190 | 50 | negative | 1.5 | IIA1 | G2 | 21.9 | Negative | negative | negative | less than 1/2 |
| 191 | 42 | negative | 0.5 | IB1  | G3 | 23.5 | Negative | negative | negative | less than 1/2 |
| 192 | 38 | positive | 2   | IB1  | G2 | 28   | positive | negative | negative | more than 1/2 |
| 193 | 40 | negative | 0.5 | IB1  | G3 | 22.8 | Negative | negative | negative | less than 1/2 |
| 194 | 42 | negative | 4.5 | IB2  | G3 | 22.1 | Negative | negative | negative | more than 1/2 |
| 195 | 37 | positive | 3   | IB1  | G2 | 28.1 | positive | negative | negative | less than 1/2 |
| 196 | 42 | positive | 2.5 | IIA2 | G2 | 29.9 | Negative | negative | negative | more than 1/2 |
| 197 | 39 | positive | 2.5 | IIA1 | G3 | 32.2 | positive | negative | negative | more than 1/2 |
| 198 | 49 | negative | 5   | IB1  | G2 | 23.5 | Negative | negative | negative | less than 1/2 |
| 199 | 45 | negative | 3   | IB2  | G2 | 30.9 | Negative | negative | positive | less than 1/2 |
| 200 | 49 | negative | 2   | IB1  | G3 | 28.9 | Negative | positive | negative | more than 1/2 |
| 201 | 43 | negative | 2.5 | IB1  | G3 | 23.8 | Negative | negative | negative | more than 1/2 |
| 202 | 53 | negative | 3   | IB1  | G3 | 27.8 | Negative | negative | negative | less than 1/2 |
| 203 | 42 | negative | 4.5 | IB1  | G1 | 26.9 | positive | negative | negative | more than 1/2 |
| 204 | 40 | negative | 2   | IB1  | G3 | 22.6 | Negative | negative | negative | more than 1/2 |
| 205 | 39 | negative | 4.5 | IIA2 | G2 | 24.1 | Negative | negative | negative | less than 1/2 |
| 206 | 37 | negative | 2   | IIA2 | G2 | 21.8 | Negative | negative | positive | less than 1/2 |
| 207 | 42 | positive | 4.5 | IB1  | G2 | 25.9 | Negative | negative | negative | more than 1/2 |
| 208 | 43 | positive | 2   | IIA1 | G3 | 30.6 | positive | positive | negative | more than 1/2 |
| 209 | 44 | negative | 2.5 | IB1  | G3 | 23.9 | Negative | negative | negative | more than 1/2 |
| 210 | 68 | positive | 1.5 | IB1  | G3 | 28.9 | positive | positive | negative | less than 1/2 |
| 211 | 31 | negative | 0.5 | IB1  | G3 | 21.1 | Negative | negative | negative | less than 1/2 |
| 212 | 47 | negative | 2   | IB2  | G2 | 21.3 | Negative | negative | negative | more than 1/2 |
| 213 | 36 | negative | 2   | IB2  | G3 | 27.8 | Negative | negative | positive | more than 1/2 |
| 214 | 43 | negative | 2   | IB1  | G3 | 26.9 | Negative | negative | negative | more than 1/2 |
| 215 | 55 | negative | 4.5 | IB1  | G3 | 23.4 | Negative | negative | negative | more than 1/2 |
| 216 | 50 | negative | 1   | IIA1 | G3 | 25.8 | Negative | negative | negative | less than 1/2 |

|     |    |          |     |      |    |      |          |          |          |               |
|-----|----|----------|-----|------|----|------|----------|----------|----------|---------------|
| 217 | 41 | negative | 0.5 | IB1  | G3 | 28.9 | Negative | negative | negative | less than 1/2 |
| 218 | 38 | negative | 3   | IB1  | G3 | 24.9 | positive | negative | negative | more than 1/2 |
| 219 | 40 | negative | 0.5 | IB2  | G3 | 29.8 | Negative | negative | negative | less than 1/2 |
| 220 | 42 | negative | 3.5 | IB1  | G2 | 22.5 | Negative | negative | negative | more than 1/2 |
| 221 | 37 | positive | 3.5 | IIA1 | G2 | 31.4 | Negative | negative | negative | more than 1/2 |
| 222 | 42 | positive | 3.5 | IA2  | G2 | 28.7 | positive | negative | negative | more than 1/2 |
| 223 | 40 | positive | 2.5 | IA2  | G2 | 25.9 | positive | negative | negative | more than 1/2 |
| 224 | 49 | negative | 2   | IA2  | G3 | 21.1 | Negative | positive | positive | less than 1/2 |
| 225 | 44 | negative | 3.5 | IA2  | G3 | 22.9 | Negative | negative | negative | less than 1/2 |
| 226 | 49 | negative | 1.5 | IIA1 | G3 | 22.1 | Negative | negative | negative | more than 1/2 |
| 227 | 43 | negative | 2.5 | IB1  | G3 | 21.8 | Negative | negative | positive | more than 1/2 |
| 228 | 51 | negative | 3   | IB1  | G3 | 20.5 | Negative | negative | negative | less than 1/2 |
| 229 | 31 | negative | 3.5 | IB1  | G2 | 31.3 | Negative | negative | positive | more than 1/2 |
| 230 | 40 | negative | 4   | IB1  | G2 | 28.9 | Negative | negative | negative | more than 1/2 |
| 231 | 38 | negative | 0.5 | IIA2 | G3 | 21.9 | Negative | negative | negative | less than 1/2 |
| 232 | 39 | negative | 1.5 | IB2  | G3 | 23.5 | Negative | negative | positive | less than 1/2 |
| 233 | 44 | negative | 3.5 | IB1  | G2 | 29.8 | Negative | negative | negative | more than 1/2 |
| 234 | 32 | negative | 2   | IIA1 | G3 | 22.8 | Negative | negative | negative | more than 1/2 |
| 235 | 36 | negative | 4.5 | IB2  | G3 | 26.7 | Negative | negative | positive | more than 1/2 |
| 236 | 42 | negative | 4.5 | IB2  | G2 | 28.9 | Negative | negative | negative | more than 1/2 |
| 237 | 55 | negative | 4   | IB2  | G3 | 22.1 | Negative | negative | negative | more than 1/2 |
| 238 | 50 | negative | 1.5 | IB1  | G2 | 22.5 | Negative | negative | negative | less than 1/2 |
| 239 | 42 | negative | 2   | IIA2 | G3 | 23.8 | Negative | negative | negative | less than 1/2 |
| 240 | 37 | positive | 5   | IIA1 | G2 | 28   | positive | negative | negative | more than 1/2 |
| 241 | 40 | negative | 1   | IB1  | G1 | 22.7 | Negative | negative | negative | less than 1/2 |
| 242 | 42 | negative | 2   | IB1  | G3 | 23.8 | Negative | negative | negative | more than 1/2 |
| 243 | 37 | positive | 3   | IB2  | G2 | 28.1 | positive | negative | negative | less than 1/2 |
| 244 | 41 | positive | 5   | IIA2 | G3 | 21.8 | Negative | negative | negative | more than 1/2 |
| 245 | 39 | positive | 3.5 | IB2  | G2 | 30.5 | positive | negative | negative | more than 1/2 |
| 246 | 49 | negative | 5   | IIA2 | G2 | 23.9 | Negative | negative | negative | less than 1/2 |
| 247 | 41 | negative | 3   | IB2  | G2 | 19.1 | Negative | negative | negative | less than 1/2 |
| 248 | 39 | positive | 4.5 | IIA2 | G2 | 32.5 | positive | negative | negative | less than 1/2 |
| 249 | 32 | negative | 4.5 | IA2  | G3 | 25.6 | Negative | negative | positive | less than 1/2 |
| 250 | 37 | negative | 0.5 | IB2  | G3 | 29.9 | Negative | negative | negative | less than 1/2 |
| 251 | 51 | negative | 1.5 | IIA1 | G3 | 26.7 | Negative | negative | negative | less than 1/2 |
| 252 | 40 | negative | 0.5 | IIA2 | G2 | 28.7 | Negative | negative | negative | less than 1/2 |
| 253 | 38 | negative | 1.5 | IB2  | G3 | 21.3 | Negative | negative | negative | less than 1/2 |
| 254 | 47 | negative | 4.5 | IB1  | G3 | 23.7 | Negative | negative | positive | less than 1/2 |
| 255 | 28 | negative | 1.5 | IA2  | G2 | 21.5 | Negative | negative | negative | more than 1/2 |
| 256 | 34 | negative | 1.5 | IB1  | G3 | 22.5 | Negative | negative | negative | more than 1/2 |
| 257 | 46 | negative | 2   | IA2  | G2 | 21.8 | Negative | negative | negative | more than 1/2 |
| 258 | 47 | negative | 4   | IIA1 | G2 | 27.7 | Negative | negative | positive | less than 1/2 |
| 259 | 30 | negative | 4.5 | IIA1 | G3 | 26.9 | Negative | negative | negative | more than 1/2 |
| 260 | 34 | negative | 4.5 | IB2  | G2 | 22.1 | Negative | negative | negative | more than 1/2 |

FIGO, the International Federation of Gynecology and Obstetrics; LVSI, lymphovascular space invasion; LNM, lymph node metastasis; BMI, body mass index; IHC, immunohistochemistry.

**Table S2. Associations of FABP5 expression levels with clinicopathological factors in early-stage cervical cancer.**

|                          | N   | FABP5                  |                         | <i>P</i> |
|--------------------------|-----|------------------------|-------------------------|----------|
|                          |     | Low (0-4) <sup>a</sup> | High (5-6) <sup>a</sup> |          |
|                          | 260 | 169                    | 91                      |          |
| Age (years)              |     |                        |                         | 0.301    |
| ≤ 35                     | 55  | 39                     | 16                      |          |
| > 35                     | 205 | 130                    | 75                      |          |
| BMI (kg/m <sup>2</sup> ) |     |                        |                         | 0.013    |
| ≤ 25                     | 158 | 112                    | 46                      |          |
| > 25                     | 102 | 57                     | 45                      |          |
| FIGO stage               |     |                        |                         | 0.001    |
| Ia2                      | 21  | 21                     | 0                       |          |
| Ib1                      | 127 | 82                     | 45                      |          |
| Ib2                      | 46  | 31                     | 15                      |          |
| IIa1                     | 38  | 25                     | 13                      |          |
| IIa2                     | 28  | 10                     | 18                      |          |
| Tumour size (cm)         |     |                        |                         | 0.02     |
| ≤ 4                      | 186 | 129                    | 57                      |          |
| > 4                      | 74  | 40                     | 34                      |          |
| LNM                      |     |                        |                         | < 0.001  |
| Positive                 | 49  | 14                     | 35                      |          |
| Negative                 | 211 | 155                    | 56                      |          |
| LVSI                     |     |                        |                         | 0.004    |
| Positive                 | 33  | 14                     | 19                      |          |
| Negative                 | 227 | 155                    | 72                      |          |
| Differentiation          |     |                        |                         | 0.541    |
| G1                       | 17  | 9                      | 8                       |          |
| G2                       | 91  | 59                     | 32                      |          |
| G3                       | 152 | 101                    | 51                      |          |
| Stomal invasion          |     |                        |                         | 0.081    |
| ≤ 1/2                    | 122 | 86                     | 36                      |          |
| > 1/2                    | 138 | 83                     | 55                      |          |
| Parametrial invasion     |     |                        |                         | 0.194    |
| Positive                 | 16  | 8                      | 8                       |          |
| Negative                 | 244 | 161                    | 83                      |          |
| Vaginal invasion         |     |                        |                         | 0.072    |
| Positive                 | 40  | 21                     | 19                      |          |
| Negative                 | 220 | 148                    | 72                      |          |

FIGO, the International Federation of Gynecology and Obstetrics; LVSI, lymphovascular space invasion; LNM, lymph node metastasis; BMI, body mass index.

<sup>a</sup>The immunostaining scores of FABP5



**Table S3. Multivariate Cox's proportional hazards model analysis of relapse-free and overall survivals.**

| Variables            | Overall survival        |          | Relapse-free probability |          |
|----------------------|-------------------------|----------|--------------------------|----------|
|                      | HR (95% CI)             | <i>P</i> | HR (95% CI)              | <i>P</i> |
| Age (year)           | 1.083<br>(1.049-1.118)  | < 0.001  | 1.075<br>(1.055-1.124)   | < 0.001  |
| Tumor size (cm)      | 1.579<br>(1.264-1.973)  | < 0.001  | 1.552<br>(1.245-1.935)   | < 0.001  |
| LNM                  |                         | < 0.001  |                          | < 0.001  |
| Negative (reference) | 1                       |          | 1                        |          |
| Positive             | 6.698<br>(3.649-12.294) |          | 5.996<br>(3.261-11.027)  |          |
| FABP5                |                         | 0.004    |                          | 0.004    |
| Low<br>(reference)   | 1                       |          | 1                        |          |
| High                 | 2.517<br>(1.334-4.750)  |          | 2.556<br>(1.345-4.857)   |          |

HR, hazard ratio; 95% CI, 95% confidence interval; LNM, lymph node metastasis.

For the stepwise multivariate analysis, forward LR method was used to select significant variables. Variables entered for analysis were the following: age, FIGO stage, tumour size, LNM, BMI, LVSI, differentiation, stromal invasion, vaginal invasion, parametrial invasion, FABP5.

**Table S4. Primers and siRNAs used in the study**

| Gene       | Sequences                              |
|------------|----------------------------------------|
| FABP5      | Forward 5'-GAATACATGAAGGAGCTAGG-3'     |
|            | Reverse 5'- ACTGAGCTTGGTCATTCTC-3'     |
| FASN       | Forward 5'- AAGGACCTGTCTAGGTTTGATGC-3' |
|            | Reverse 5'- TGGCTTCATAGGTGACTTCCA-3'   |
| ACC1       | Forward 5'- AGGAAGATGGTGTCCGCTCTG-3'   |
|            | Reverse 5'- GGGGAGATGTGCTGGGTCAT-3'    |
| CPT1A      | Forward 5'- TCCAGTTGGCTTATCGTGGTG-3'   |
|            | Reverse 5'- TCCAGAGTCCGATTGATTTTTGC-3' |
| ACOX1      | Forward 5'- ACTCGCAGCCAGCGTTATG-3'     |
|            | Reverse 5'- AGGGTCAGCGATGCCAAAC-3'     |
| HSL        | Forward 5'-TCAGTGTCTAGGTCAGACTGG-3'    |
|            | Reverse 5'- AGGCTTCTGTTGGGTATTGGA-3''  |
| GAPDH      | Forward 5'-ATCACCATCTTCCAGGAGCGA-3'    |
|            | Reverse 5'-CCTTCTCCATGGTGGTGAAGAC-3'   |
| TWIST1     | Forward 5'-GTCCGCAGTCTTACGAGGAG-3'     |
|            | Reverse 5'-GCTTGAGGGTCTGAATCTTGCT-3'   |
| MMP9       | Forward 5'-TGTACCGCTATGGTTACACTCG-3'   |
|            | Reverse 5'-GGCAGGGACAGTTGCTTCT-3'      |
| VEGF-C     | Forward 5'-GAGGAGCAGTTACGGTCTGTG-3'    |
|            | Reverse 5'-TCCTTTCCTTAGCTGACACTTGT-3'  |
| miR-144-3p | Forward 5'-CCCTACAGTATAGATGATG-3'      |
|            | Reverse 5'-TGCAGGGTCCGAGGT-3'          |
| U6         | Forward 5'-ACAGATCTGTCCGGTGTGGCAC-3'   |
|            | Reverse 5'-GGCCCCGGATTATCCGACATTC-3'   |
| siFABP5    | Sense 5'-UGUACCCUGGGAGAGAAGUTT-3'      |
|            | Antisense 5'-ACUUCUCUCCCAGGGUACATT-3'  |
| siNC       | Sense 5'-UUCUCCGAACGUGUCACGUTT-3'      |
|            | Antisense 5'-ACGUGACACGUUCGGAGAATT-3'  |
| shFABP5    | 5'-TGGGAAGGAAAGCACAATA-3'              |
| shNC       | 5'-TTCTCCGAACGTGTCACGT-3'              |

**Table S5. Antibodies used in the study.**

| Antibody   | Catalog#   | Working concentration | Manufacturer |
|------------|------------|-----------------------|--------------|
| FABP5      | 39926S     | 1:1000                | CST          |
| CPT1A      | 12252S     | 1:1000                | CST          |
| ACC1       | 3676S      | 1:1000                | CST          |
| ACOX1      | ab184032   | 1:1000                | Abcam        |
| FASN       | ab22759    | 1:1000                | Abcam        |
| GAPDH      | 2118S      | 1:500                 | CST          |
| VEGF-C     | sc-374628  | 1:1000                | Santa Cruz   |
| E-Cadherin | 20874-1-AP | 1:5000                | Proteintech  |
| N-Cadherin | 22018-1-AP | 1:5000                | Proteintech  |
| Vimentin   | 5741S      | 1:1000                | CST          |
| CA9        | ab15086    | 1:1000                | Abcam        |
| HSL        | sc-74489   | 1:800                 | Santa Cruz   |
| p65        | sc-8008    | 1:500                 | Santa Cruz   |
| p84        | ab487      | 1:800                 | Abcam        |

**Supplementary figure**

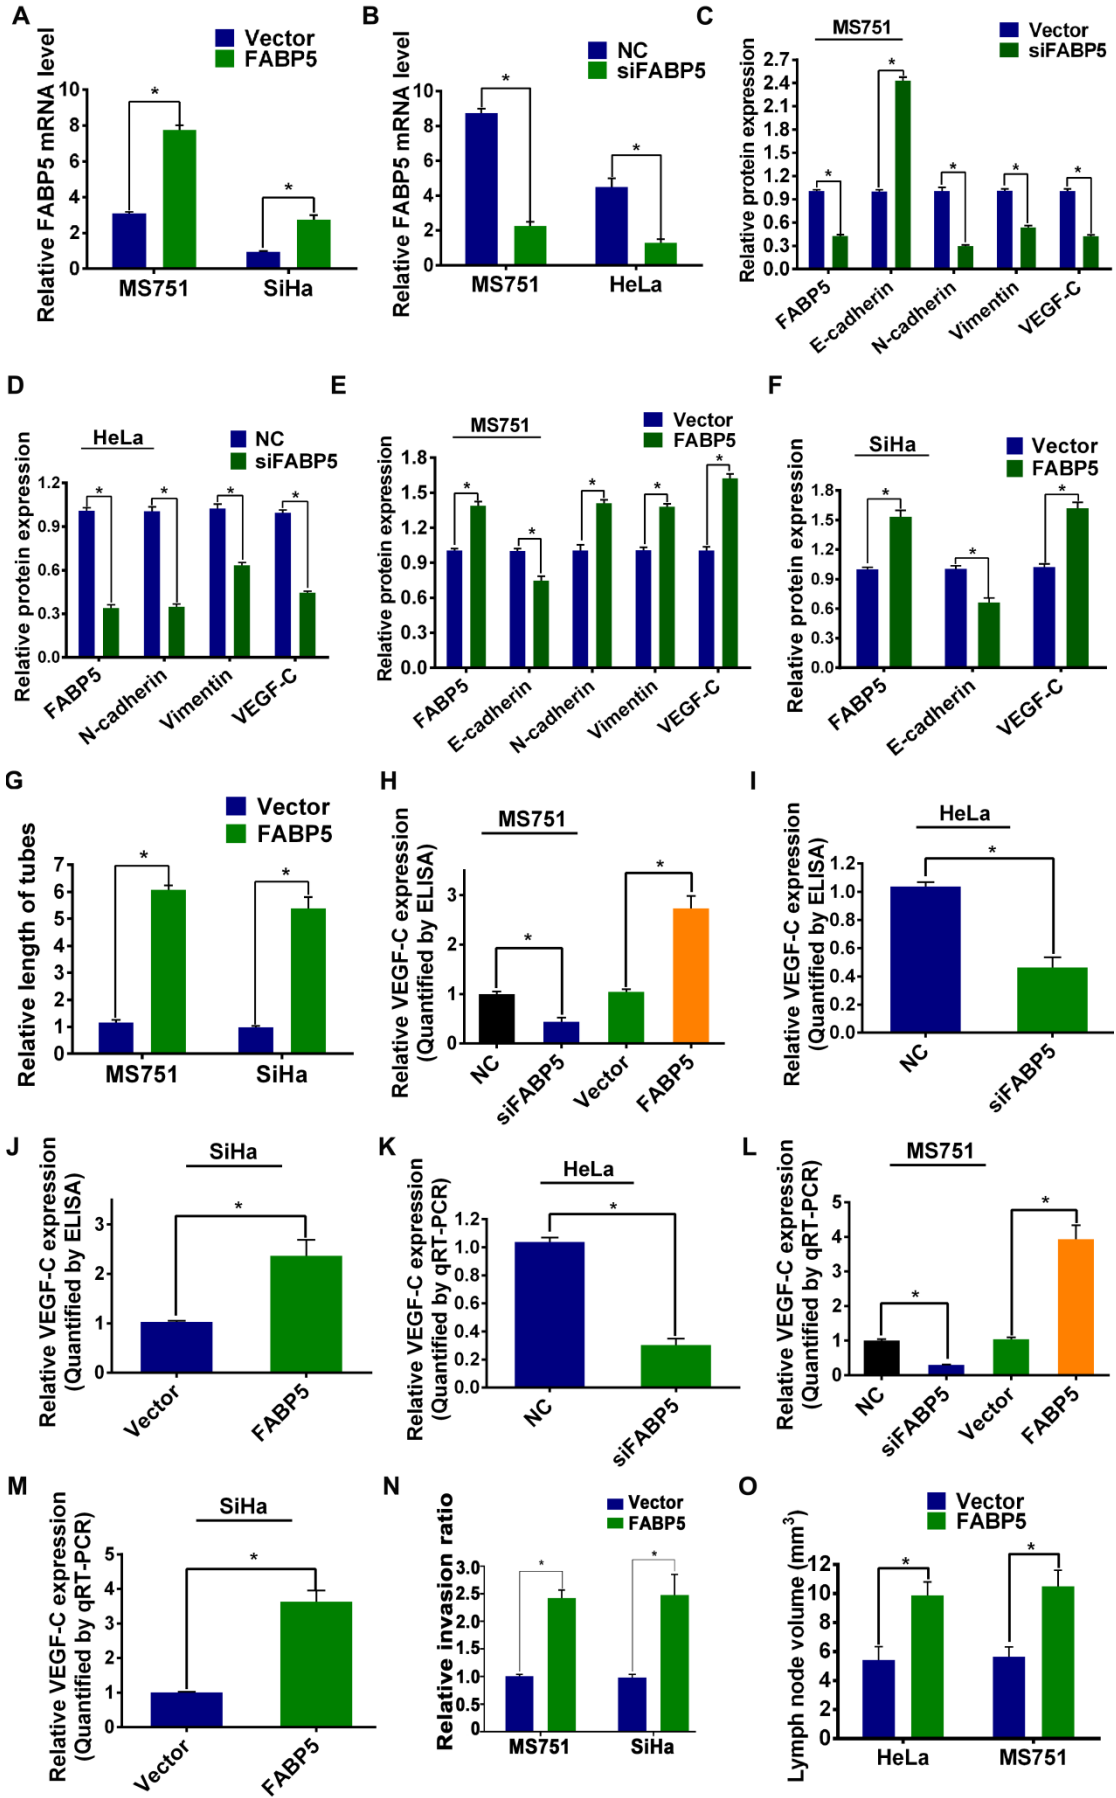

**Figure S1. FABP5 promotes EMT, tube formation of HLECs, and the expression of VEGF-C in CCa.**

(A) Real-time PCR results showed the efficiencies of FABP5 overexpression in indicated cells. (B) Real-time PCR results showed the efficiencies of FABP5 knockdown in indicated cells. (C-F) Quantification of western blot analysis of EMT markers and VEGF-C in indicated cells with knockdown or overexpression of FABP5. (G) The effects of FABP5 on the tube formation of HLECs. (H-J) The effect of FABP5 on VEGF-C secretion was evaluated by ELISA. (K-M) The effect of FABP5 on VEGF-C expression was evaluated by qRT-PCR. (N) Relative invasion ratio of MS751 and SiHa cells with FABP5 overexpression. (O) Histogram analysis of the volume of lymph nodes of indicated cells. Error bars represent the mean  $\pm$  S.D. of three independent experiments. \* $P < 0.05$ .

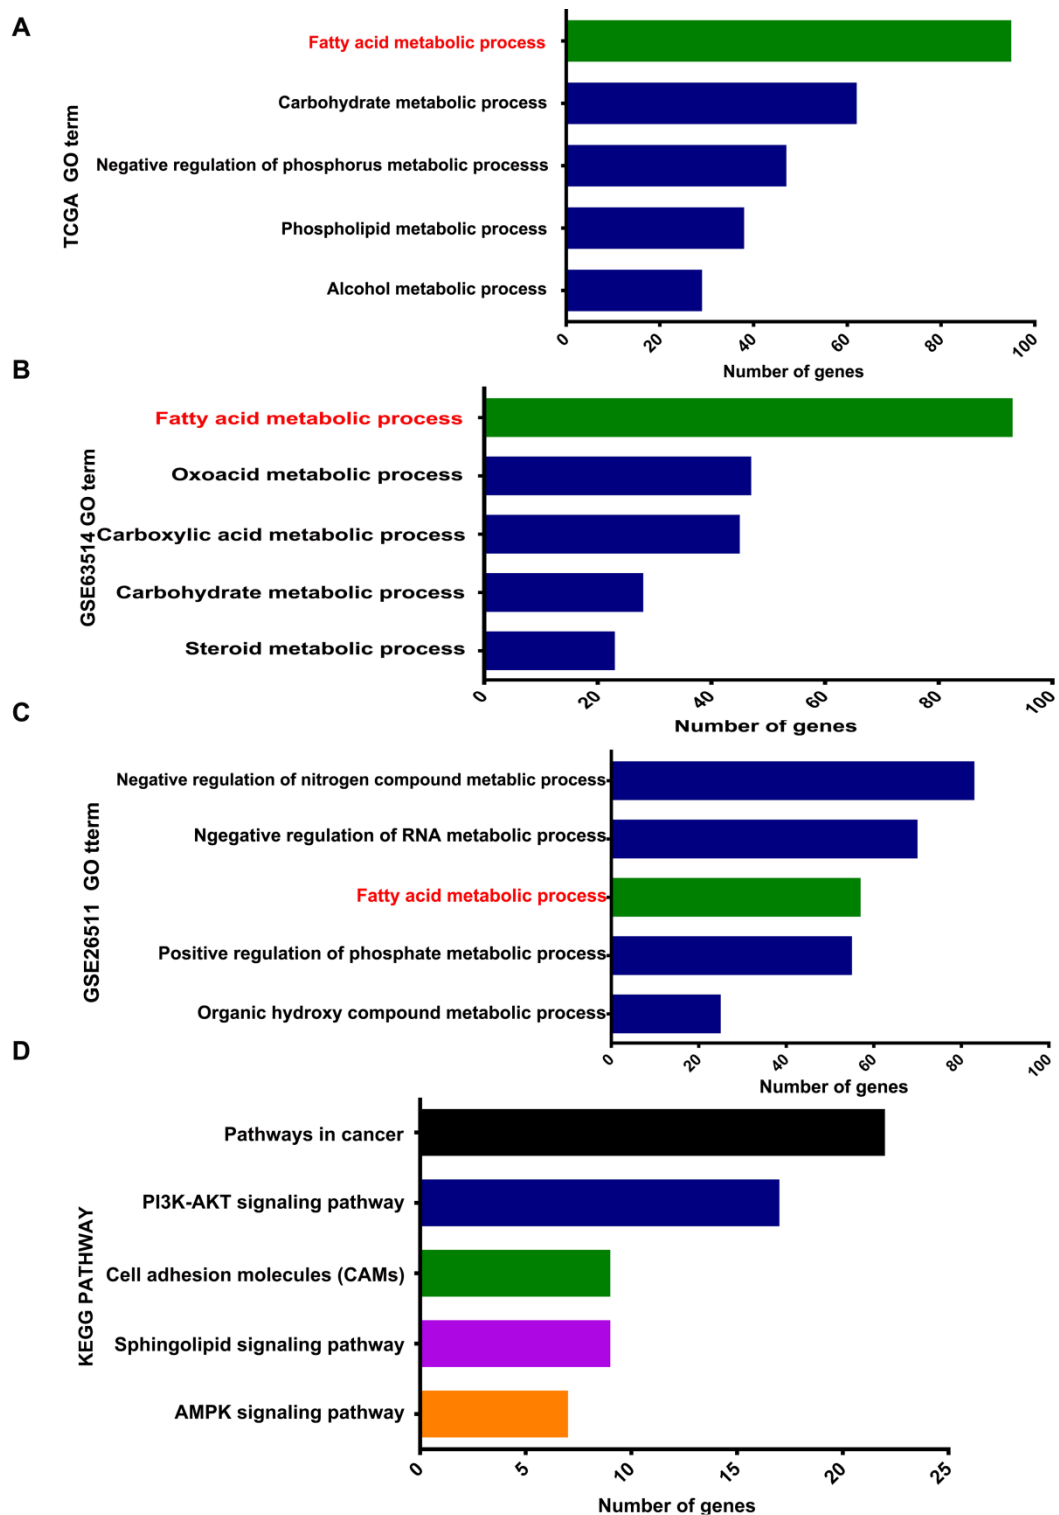

**Figure S2. Bioinformatic analysis of genes correlated with FABP5.** (A) The Gene Ontology analysis of genes correlated with FABP5 in TCGA dataset. (B) The Gene Ontology analysis of genes correlated with FABP5 in GSE63514 dataset. (C) The Gene Ontology analysis of genes correlated with FABP5 in GSE26511 dataset. (D) The KEGG pathway enrichment analysis of genes correlated with FABP5 co-existing in TCGA, GSE26511, GSE63514 datasets.

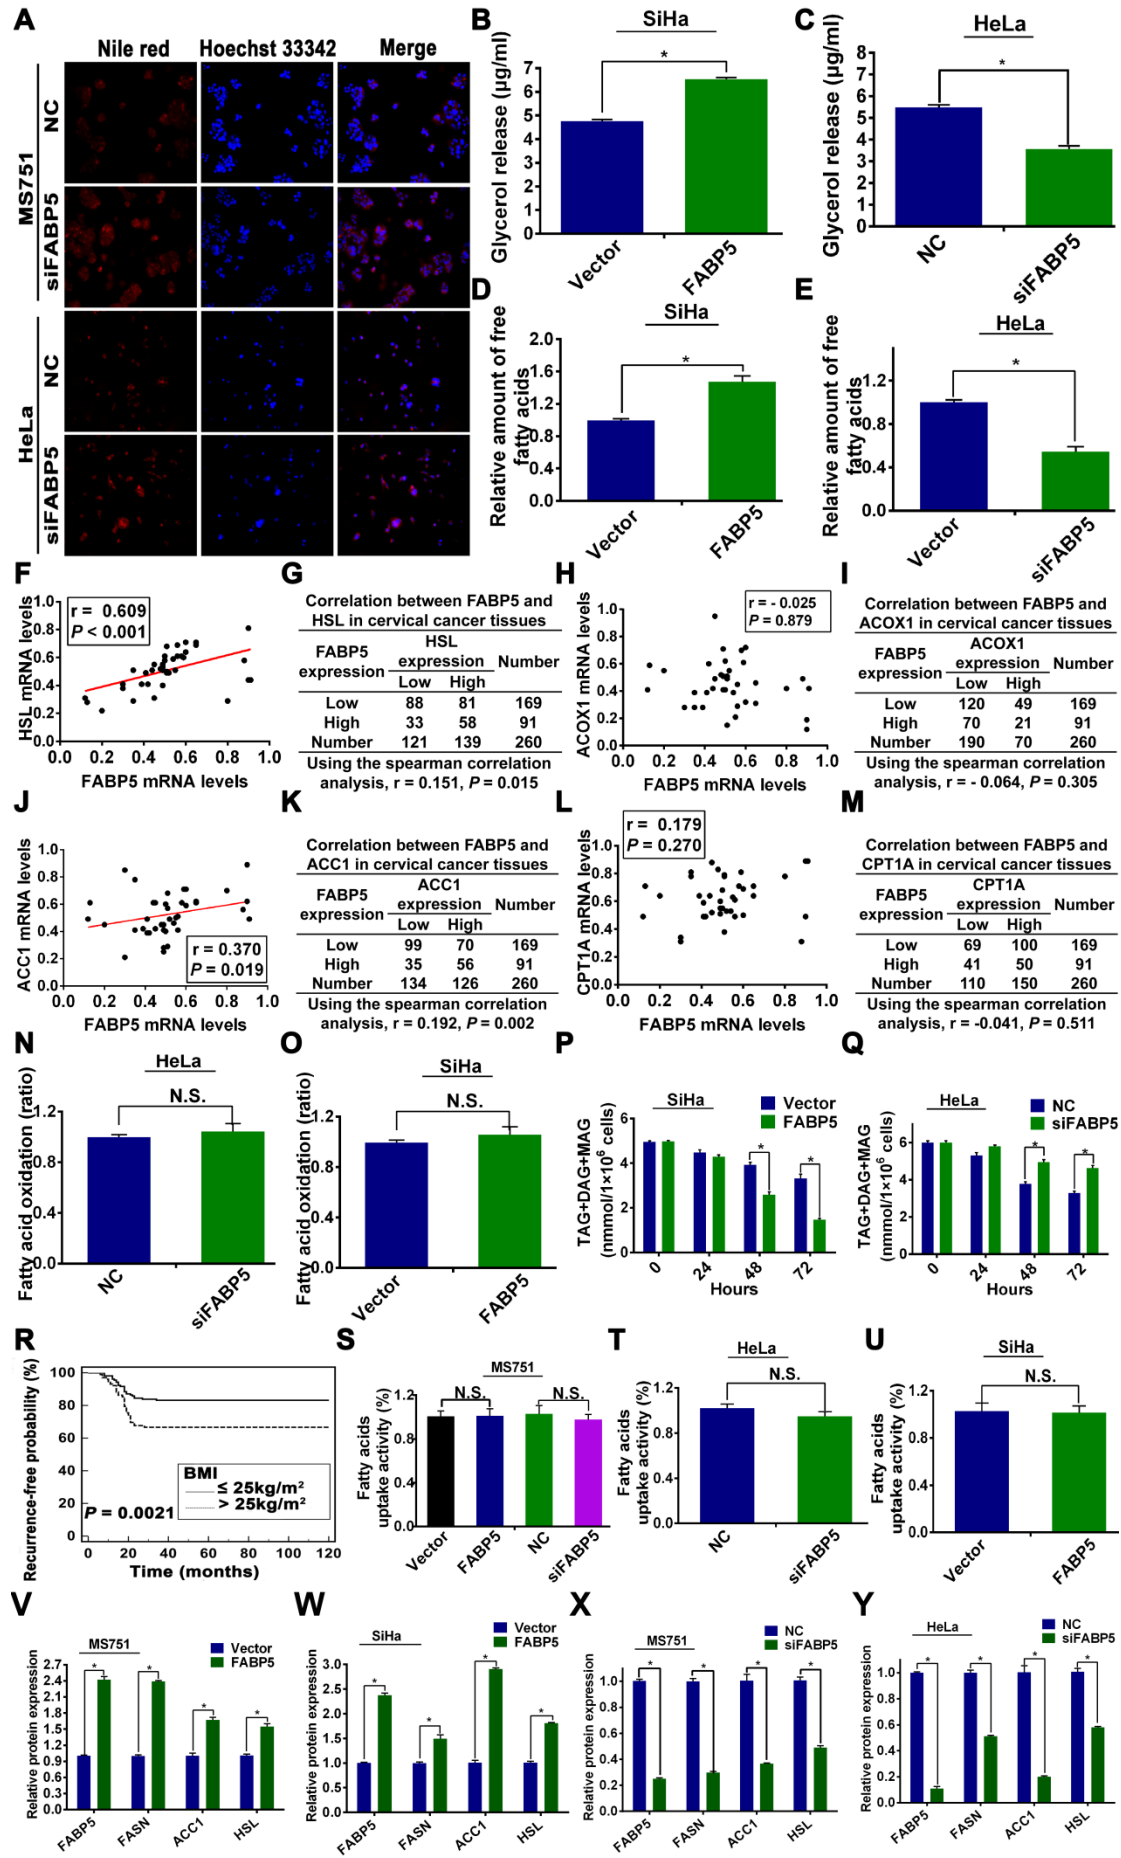



**Figure S3. Effects of FABP5 expression on fatty acid metabolism in CCa cells.** (A) Lipid droplets were detected using Nile red in indicated cells with FABP5 knockdown. (B) Glycerol was measured in SiHa cells with FABP5 overexpression. (C) The amount of glycerol was measured in HeLa cells with FABP5 knockdown. (D) The amount of free fatty acids was measured in SiHa cells with FABP5 overexpression. (E) The amount of free fatty acids was measured in HeLa cells with FABP5 knockdown. (F, H, J, L) Scatter plot analysis of correlation between mRNA expression levels of FABP5 and HSL, ACOX1, ACC1, CPT1A in 40 cervical cancer tissues. (G, I, K, M) The relationships between the protein expression level of FABP5 and HSL, ACOX1, ACC1, CPT1A were examined based on IHC staining. (N) Fatty acid oxidation was measured in HeLa cells with FABP5 knockdown. (O) Fatty acid oxidation was measured in SiHa cells with FABP5 overexpression. (P) The amount of intracellular neutral lipids (TAG, DAG, and MAG) was measured in SiHa cells with FABP5 overexpression. (Q) The amount of intracellular neutral lipids (TAG, DAG, and MAG) was measured in HeLa cells with FABP5 knockdown. (R) Kaplan–Meier survival curves of RFS of patients with CCa according to BMI. (S-U) Effects of FABP5 on the fatty acids uptake activity in the indicated cells. (V-Y) Quantification of western blot analysis for protein levels of FASN, ACC1, HSL, and FABP5 in the indicated cells. Error bars represent the mean  $\pm$  S.D. of three independent experiments. \* $P < 0.05$ .

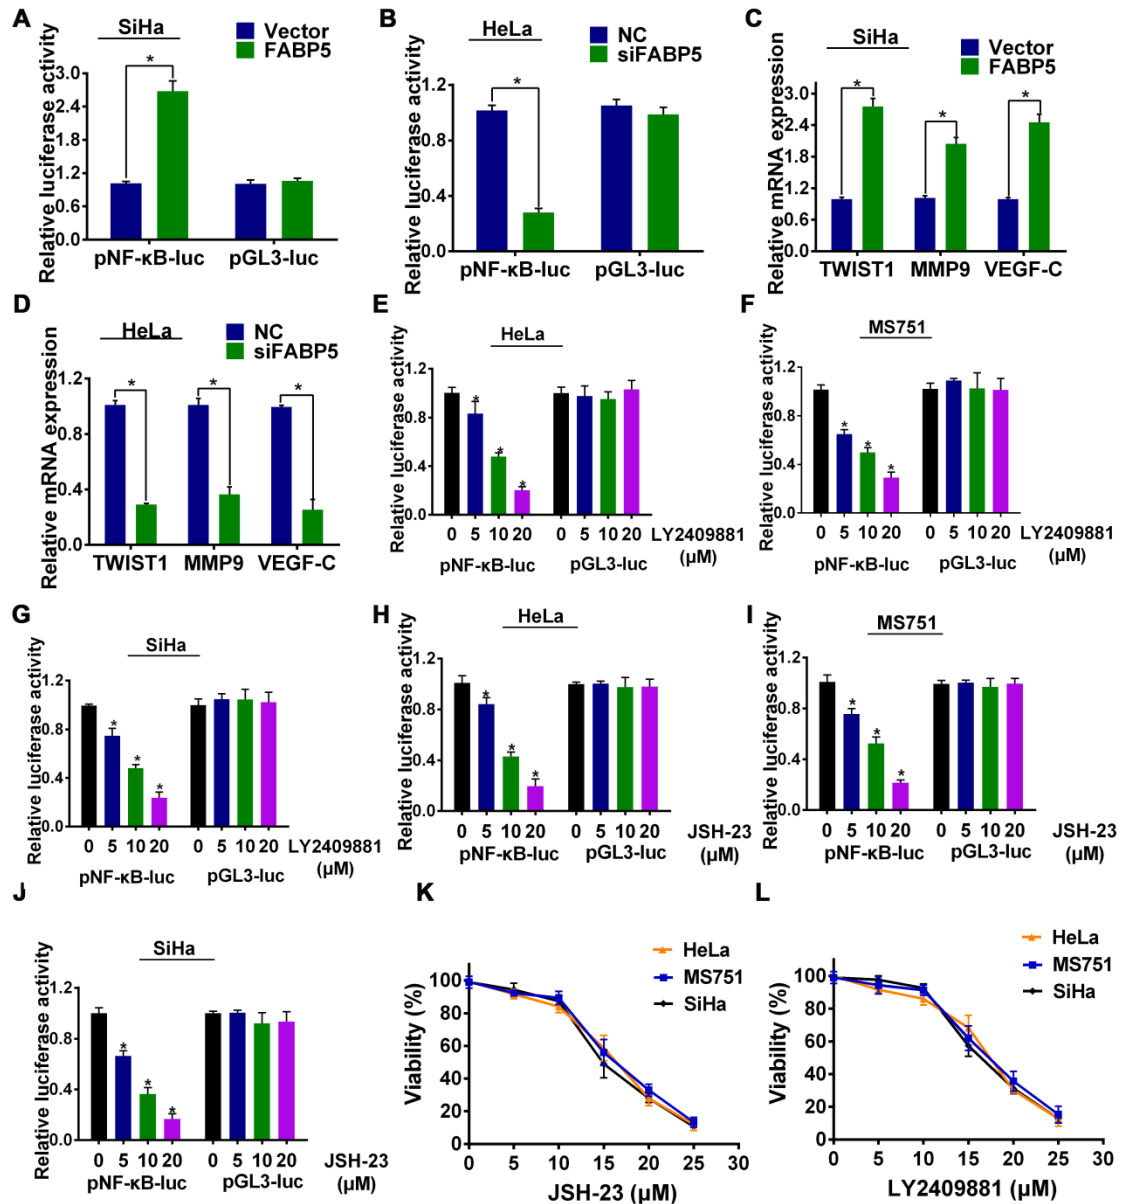

**Figure S4. FABP5 activates NF-κB signaling pathway.** (A, B) NF-κB transcriptional activity was assessed by luciferase reporter constructs in the indicated cells. (C, D) Real-time PCR analysis of TWIST1, MMP9 and VEGF-C in the indicated cells. (E-G) NF-κB signalling inhibitor LY2409881 inhibited the NF-κB transcriptional activity in a dose-dependent manner in the indicated cells. (H-J) NF-κB signalling inhibitor JSH-23 inhibited the NF-κB transcriptional activity in a dose-dependent manner in the indicated cells. (K, L) The effect of JSH-23 or LY2409881 on proliferation of CCa cells by CCK-8 assays. MS751, HeLa, SiHa cells were treated by JSH-23 or LY2409881 at the indicated concentrations for 48 hours. Error bars represent the mean ± S.D. of three independent experiments. \* $P < 0.05$ .

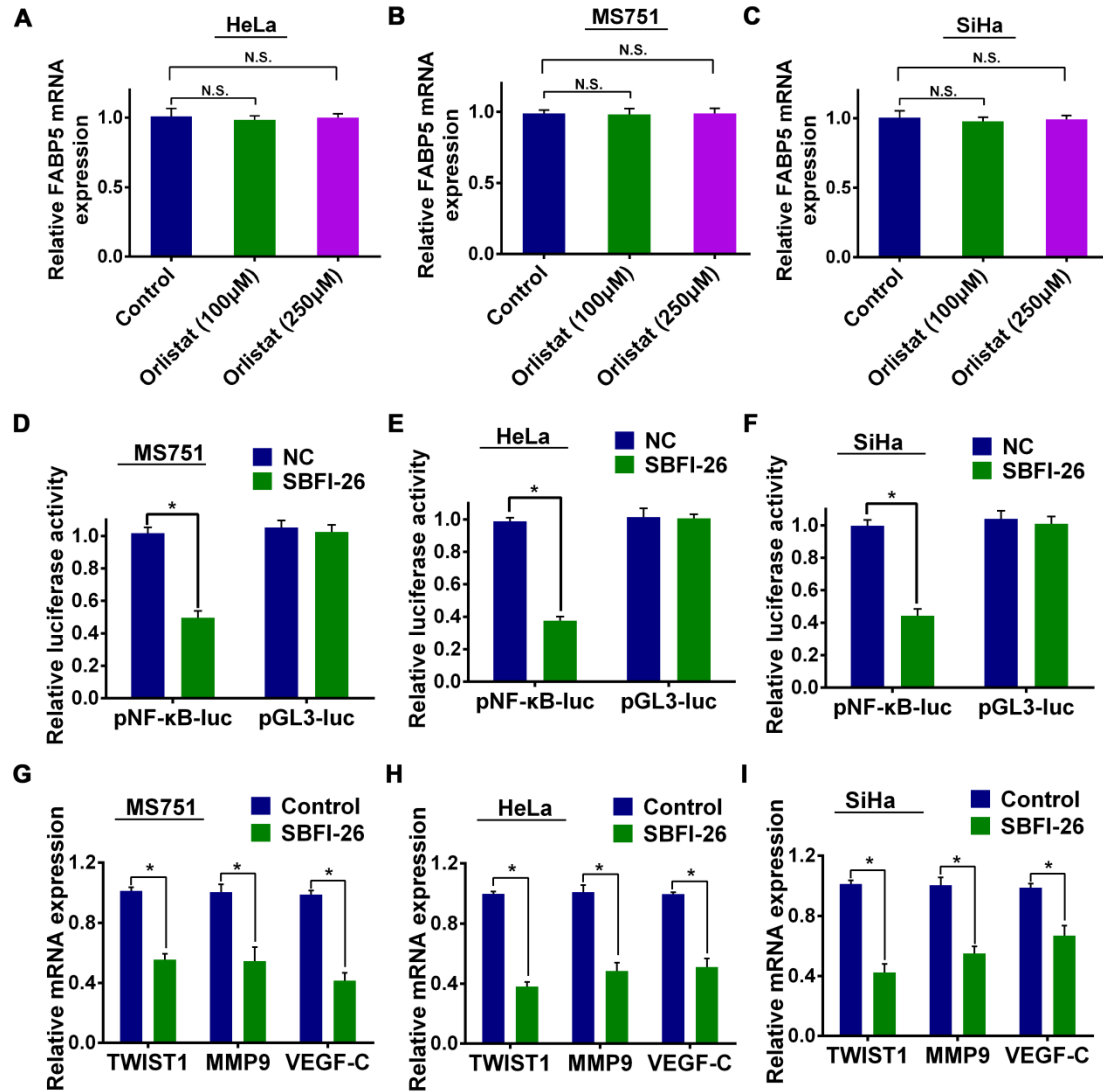

**Figure S5. Effect of orlistat on the expression of FABP5 and the effect of SBFI-26 (FABP5 inhibitor) on the activity of NF-κB signaling in CCa cells.** (A-C) The effect of orlistat on FABP5 mRNA expression in indicated cells. (D-F) NF-κB transcriptional activity was assessed by luciferase reporter constructs in the indicated cells treated by SBFI-26 (5 μM). (G-I) Real-time PCR analysis of NF-κB signaling downstream target genes (TWIST1, MMP9, and VEGF-C) in the indicated cells treated by SBFI-26 (5 μM).

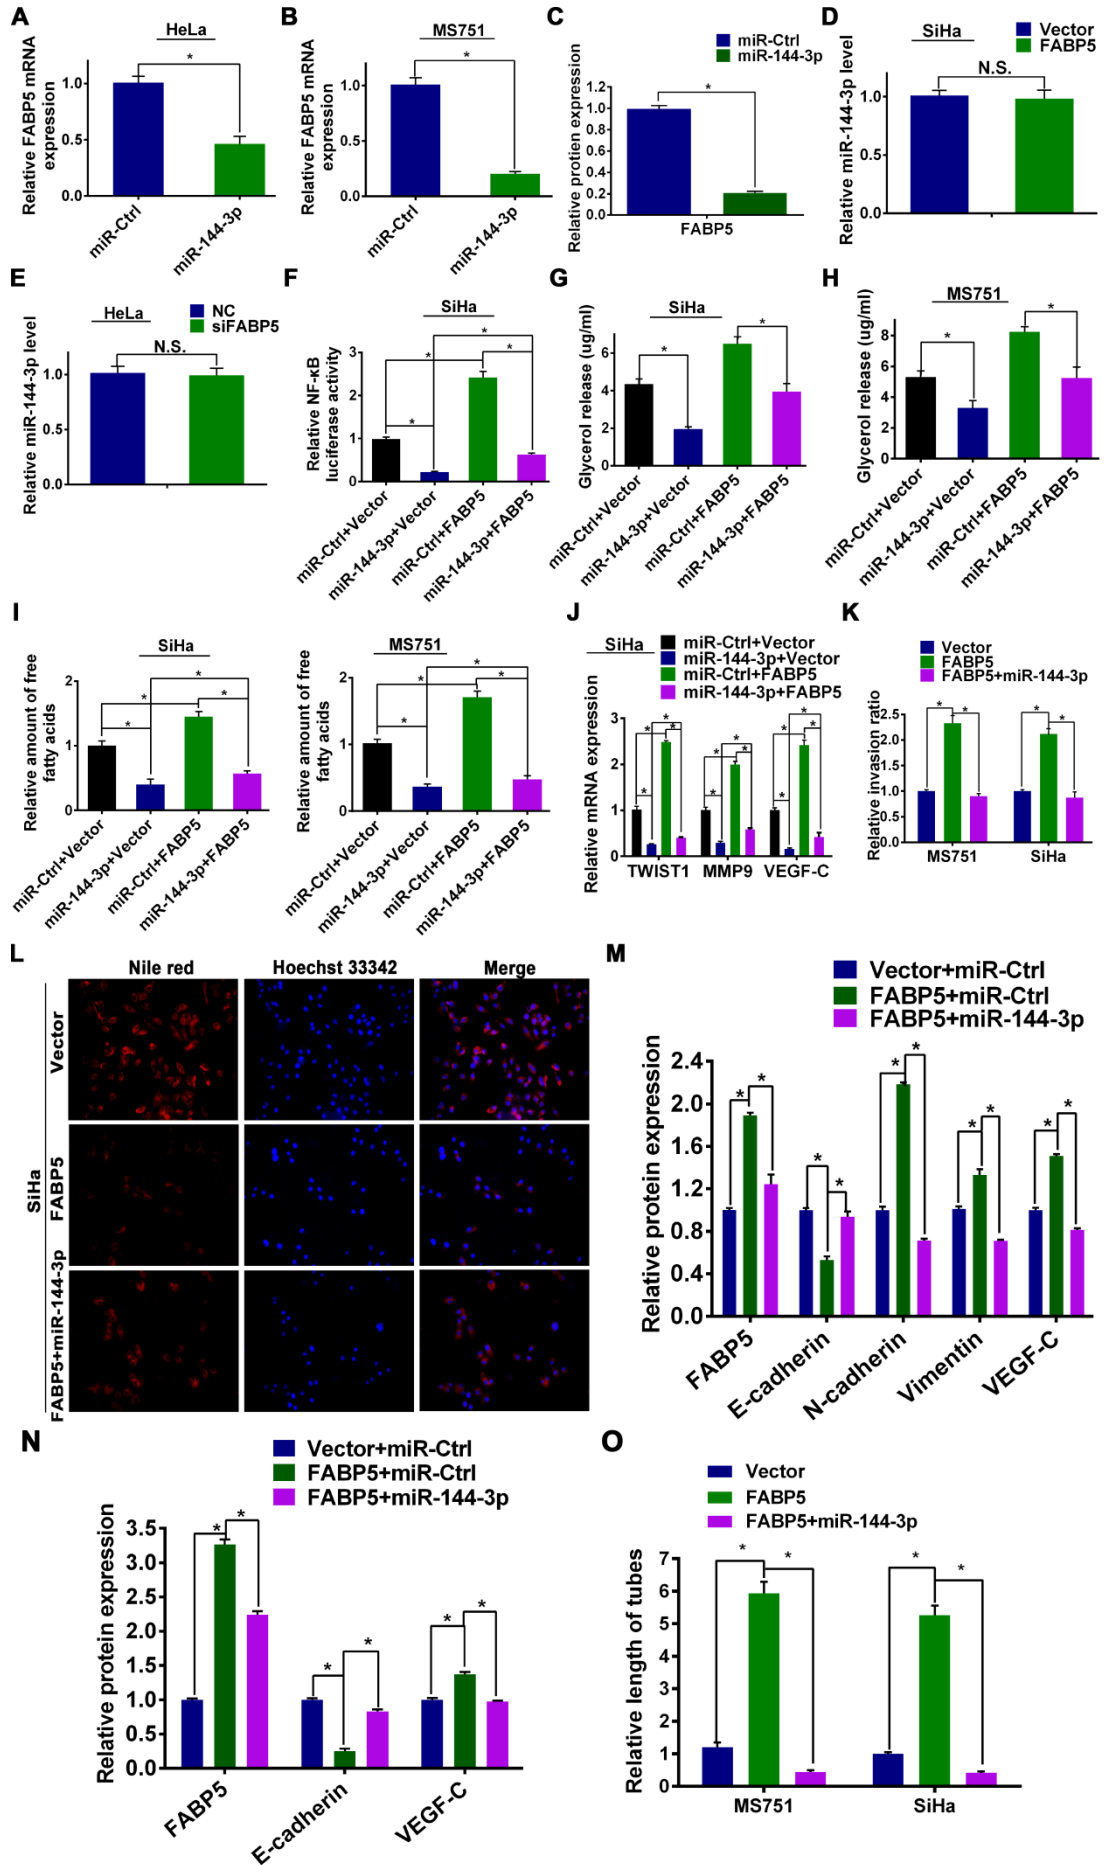

**Figure S6. Effect of miR-144-3p on FABP5 and tumor progression.** (A, B) Effect of miR-144-3p mimic transfection on FABP5 expression levels in the indicated cells. (C) Quantification of western blot analysis for protein levels of FABP5 in MS751 cells treated with miR-144-3p. (D, E) Effect of FABP5 on miR-144-3p expression levels in the indicated cells. (F) NF- $\kappa$ B transcriptional activity was assessed by luciferase reporter constructs in the indicated cells. (G, H) Effect of miR-144-3p mimic transfection on the amount of glycerol in the indicated cells. (I) Effect of miR-144-3p mimic transfection on the amount of free fatty acids in the indicated cells. (J) Real-time PCR analysis of NF- $\kappa$ B signaling downstream target genes (TWIST1, MMP9 and VEGF-C) in the indicated cells. (K) miR-144-3p attenuated the stimulatory effect of FABP5 on invasion ability in the indicated cells respectively. (L) Lipid drops were detected using Nile Red in SiHa cells treated with miR-144-3p mimics. (M, N) Quantification of western blot analysis of EMT markers and VEGF-C in indicated cells treated with miR-144-3p mimics. (O) miR-144-3p mimics attenuated the stimulatory effect of FABP5 on the tube formation of HLECs. Error bars represent the mean  $\pm$  S.D. of three independent experiments. \* $P < 0.05$ .

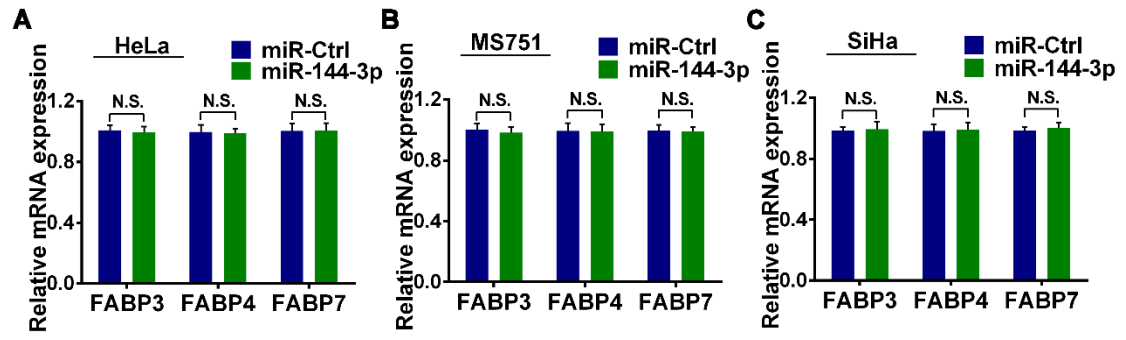

**Figure S7. Effect of miR-144-3p on FABP3, FABP4, FABP7 and tumor progression.** (A-C) Effect of miR-144-3p mimics transfection on FABP3, FABP4, and FABP7 expression levels in indicated cells.
